# Supplementary material for: Development of a High-Resolution Integrated Emission Inventory of Air Pollutants for China
Source: Copernicus journal article supplement (doi:10.5194/essd-2024-3), 2024-01-26
Supplement: Supplementary file 1 [file essd-2024-3-supplement.pdf]

1 ***Supporting information for:***

2

3 **Development of a High-Resolution Integrated Emission Inventory of**  
4 **Air Pollutants for China**

5 Nana Wu<sup>1</sup>, Guannan Geng<sup>2,3\*</sup>, Ruochong Xu<sup>1</sup>, Shigan Liu<sup>1</sup>, Xiaodong Liu<sup>2</sup>, Qinren Shi<sup>2</sup>, Ying Zhou<sup>4</sup>, Yu  
6 Zhao<sup>5</sup>, Huan Liu<sup>2,3</sup>, Yu Song<sup>6</sup>, Junyu Zheng<sup>7</sup>, and Qiang Zhang<sup>1</sup>

7 <sup>1</sup>Ministry of Education Key Laboratory for Earth System Modeling, Department of Earth System Science, Tsinghua University,  
8 Beijing 100084, China

9 <sup>2</sup>State Key Joint Laboratory of Environment Simulation and Pollution Control, School of Environment, Tsinghua University,  
10 Beijing 100084, China

11 <sup>3</sup>State Environmental Protection Key Laboratory of Sources and Control of Air Pollution Complex, Beijing 100084, China

12 <sup>4</sup>Key Laboratory of Beijing on Regional Air Pollution Control, Faculty of Environment and Life, Beijing University of  
13 Technology, Beijing, 100124, China

14 <sup>5</sup>State Key Laboratory of Pollution Control and Resource Reuse and School of the Environment, Nanjing University, 163  
15 Xianlin Rd., Nanjing, Jiangsu 210023, China

16 <sup>6</sup>State Key Joint Laboratory of Environmental Simulation and Pollution Control, College of Environmental Sciences and  
17 Engineering, Peking University, Beijing 100871, PR China

18 <sup>7</sup>Sustainable Energy and Environmental Thrust, The Hong Kong University of Science and Technology (Guangzhou),  
19 Guangzhou, 511458, China

20 *Correspondence to:* Guannan Geng (guannangeng@tsinghua.edu.cn)

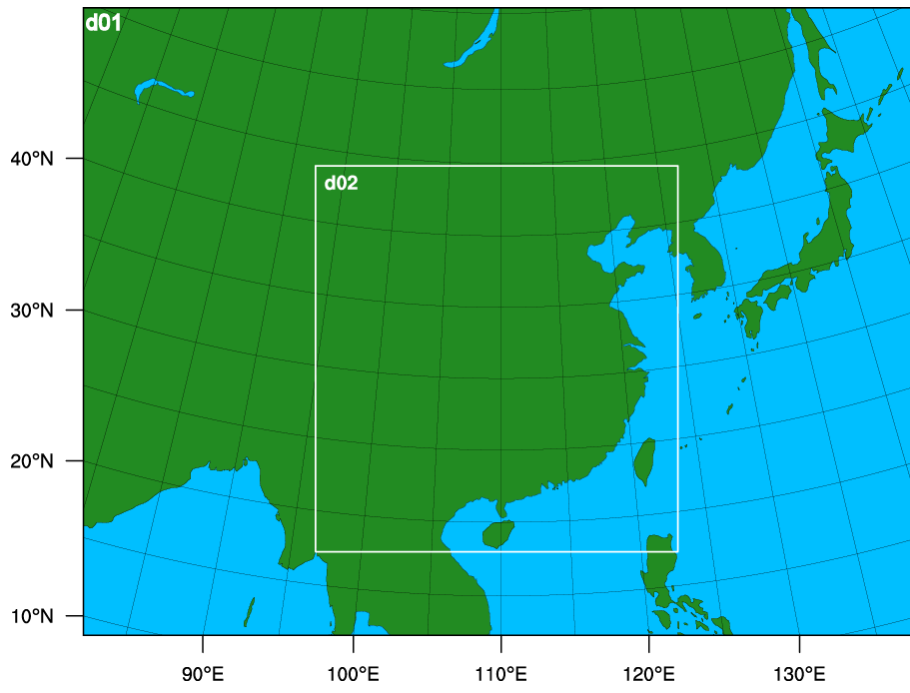

**Figure S1: Two nested domains in this study.** The first domain (D01) covers the entire China and parts of neighboring countries, and the second domain (D02) covers the Eastern China.

Table S1: Evaluation of simulated temperature, relative humidity, wind speed, and wind direction for D01 in 2017.

| Variable                    | Month | Sample | Mean_obs | Mean_sim | Corr | MB   | RMSE | NMB(%) | NME(%) |
|-----------------------------|-------|--------|----------|----------|------|------|------|--------|--------|
| Temperature<br>(°C)         | 1     | 425737 | 277.1    | 276.5    | 0.98 | -0.6 | 2.3  | 3.2    | -0.2   |
|                             | 2     | 398617 | 279      | 278.2    | 0.97 | -0.8 | 2.3  | 3.2    | -0.3   |
|                             | 3     | 444709 | 282.9    | 281.9    | 0.96 | -0.9 | 2.3  | 3.3    | -0.3   |
|                             | 4     | 430935 | 289.1    | 288.1    | 0.95 | -1   | 2.2  | 3.1    | -0.3   |
|                             | 5     | 443495 | 293.4    | 292.6    | 0.93 | -0.8 | 2.1  | 3      | -0.3   |
|                             | 6     | 423895 | 295.6    | 295      | 0.92 | -0.6 | 1.9  | 2.8    | -0.2   |
|                             | 7     | 432868 | 298.8    | 298.1    | 0.89 | -0.7 | 1.9  | 2.6    | -0.2   |
|                             | 8     | 437872 | 298      | 297.4    | 0.92 | -0.6 | 1.7  | 2.5    | -0.2   |
|                             | 9     | 430728 | 294.8    | 294.2    | 0.94 | -0.6 | 1.8  | 2.5    | -0.2   |
|                             | 10    | 448579 | 289.5    | 289.1    | 0.97 | -0.4 | 1.8  | 2.5    | -0.1   |
|                             | 11    | 431392 | 283.4    | 283      | 0.98 | -0.4 | 1.9  | 2.7    | -0.1   |
|                             | 12    | 445121 | 278      | 277.5    | 0.98 | -0.5 | 2.1  | 2.9    | -0.2   |
| Relative<br>Humidity<br>(%) | 1     | 425354 | 68       | 72.1     | 0.77 | 4.1  | 10   | 13.2   | 6      |
|                             | 2     | 398268 | 64.1     | 69.3     | 0.78 | 5.1  | 10.6 | 13.9   | 8      |
|                             | 3     | 444073 | 64.4     | 70       | 0.8  | 5.6  | 10.8 | 14.3   | 8.6    |
|                             | 4     | 429336 | 63.4     | 68.7     | 0.84 | 5.3  | 10.3 | 13.9   | 8.4    |
|                             | 5     | 443006 | 65       | 68.8     | 0.86 | 3.8  | 9.5  | 12.7   | 5.9    |
|                             | 6     | 423251 | 71       | 73.4     | 0.85 | 2.4  | 8.7  | 11.6   | 3.4    |
|                             | 7     | 432151 | 75.9     | 78.4     | 0.84 | 2.5  | 8.1  | 10.7   | 3.3    |
|                             | 8     | 437176 | 76.7     | 79       | 0.82 | 2.3  | 7.9  | 10.4   | 3      |
|                             | 9     | 429720 | 73.9     | 76       | 0.85 | 2.1  | 8.1  | 10.8   | 2.9    |
|                             | 10    | 447503 | 73.5     | 75.4     | 0.85 | 1.9  | 8.0  | 10.7   | 2.5    |
|                             | 11    | 430711 | 68.9     | 72       | 0.82 | 3.1  | 8.9  | 11.9   | 4.5    |
|                             | 12    | 444518 | 66.5     | 70.7     | 0.81 | 4.2  | 9.5  | 12.5   | 6.3    |
| Wind Speed<br>(m/s)         | 1     | 404082 | 2.8      | 3.2      | 0.6  | 0.4  | 1.6  | 2.2    | 14.9   |
|                             | 2     | 381158 | 2.9      | 3.3      | 0.62 | 0.3  | 1.6  | 2.1    | 11.7   |
|                             | 3     | 428428 | 2.7      | 2.9      | 0.59 | 0.2  | 1.4  | 1.9    | 6      |
|                             | 4     | 418972 | 3        | 3.1      | 0.63 | 0.1  | 1.5  | 1.9    | 2.3    |
|                             | 5     | 431251 | 2.7      | 2.7      | 0.62 | 0    | 1.3  | 1.8    | -1     |
|                             | 6     | 410320 | 2.6      | 2.6      | 0.56 | 0    | 1.3  | 1.7    | -1     |
|                             | 7     | 417858 | 2.4      | 2.4      | 0.53 | 0    | 1.3  | 1.7    | -1.9   |
|                             | 8     | 424714 | 2.5      | 2.5      | 0.58 | 0    | 1.3  | 1.7    | -1     |
|                             | 9     | 417017 | 2.5      | 2.5      | 0.63 | 0.1  | 1.3  | 1.7    | 2.8    |
|                             | 10    | 429166 | 2.7      | 2.8      | 0.67 | 0.2  | 1.4  | 1.9    | 5.8    |
|                             | 11    | 416456 | 2.7      | 2.9      | 0.64 | 0.2  | 1.4  | 1.9    | 7.7    |
|                             | 12    | 428713 | 2.8      | 3.1      | 0.66 | 0.3  | 1.5  | 2      | 10.5   |

| Variable                   | Month | Sample | Mean_obs | Mean_sim | Corr | MB    | RMSE | NMB(%) | NME(%) |
|----------------------------|-------|--------|----------|----------|------|-------|------|--------|--------|
| Wind<br>Direction<br>( ° ) | 1     | 344078 | 207.3    | 202.5    | 0.4  | -4.8  | 79.4 | 125.8  | -2.3   |
|                            | 2     | 325981 | 210.2    | 209.2    | 0.43 | -0.9  | 72.9 | 117.1  | -0.4   |
|                            | 3     | 368216 | 202.3    | 196.1    | 0.41 | -6.3  | 76.9 | 121.3  | -3.1   |
|                            | 4     | 363361 | 198.5    | 194.1    | 0.42 | -4.4  | 66.3 | 106.5  | -2.2   |
|                            | 5     | 368370 | 192.7    | 185.7    | 0.38 | -7    | 70.6 | 109.8  | -3.6   |
|                            | 6     | 351094 | 189.9    | 180.7    | 0.35 | -9.2  | 71.6 | 111.2  | -4.8   |
|                            | 7     | 356046 | 192.7    | 184.5    | 0.34 | -8.1  | 67.1 | 103.5  | -4.2   |
|                            | 8     | 362346 | 188      | 171.4    | 0.38 | -16.6 | 71   | 111.6  | -8.8   |
|                            | 9     | 349721 | 194.6    | 180.1    | 0.38 | -14.5 | 73.9 | 115.5  | -7.5   |
|                            | 10    | 357403 | 183.5    | 159.8    | 0.4  | -23.6 | 81.6 | 129.8  | -12.9  |
|                            | 11    | 351239 | 203.7    | 192.2    | 0.42 | -11.5 | 76.7 | 122.4  | -5.7   |
|                            | 12    | 365757 | 211.2    | 200.4    | 0.42 | -10.8 | 76.9 | 123.1  | -5.1   |

26      **Table S2: The discrepancies between simulated NH<sub>4</sub><sup>+</sup> concentrations and observed values, using MEIC and HIEIC as emission**  
27 **inputs.** The observed concentrations are collected from previous studies (Zhang et al., 2019).

| Month | MEIC                 |                      |                      |     |     | HIEIC                |                      |                      |     |     |
|-------|----------------------|----------------------|----------------------|-----|-----|----------------------|----------------------|----------------------|-----|-----|
|       | Obs                  | Sim                  | MB                   | NMB | NME | Obs                  | Sim                  | MB                   | NMB | NME |
|       | (µg/m <sup>3</sup> ) | (µg/m <sup>3</sup> ) | (µg/m <sup>3</sup> ) | (%) | (%) | (µg/m <sup>3</sup> ) | (µg/m <sup>3</sup> ) | (µg/m <sup>3</sup> ) | (%) | (%) |
| Jan.  | 12.9                 | 5.9                  | -7.0                 | -53 | 53  | 12.9                 | 6.4                  | -6.5                 | -50 | 50  |
| Apr.  | 5.5                  | 4.7                  | -0.8                 | -16 | 25  | 5.5                  | 3.8                  | -1.7                 | -32 | 32  |
| Jul.  | 3.4                  | 2.5                  | -0.9                 | -26 | 26  | 3.4                  | 2.9                  | 0.5                  | -15 | 15  |
| Oct.  | 5.9                  | 5.2                  | -0.7                 | -12 | 33  | 5.9                  | 5.9                  | 0.0                  | 1   | 38  |

## 28     **References**

29     Zhang, Q., Zheng, Y., Tong, D., Shao, M., Wang, S., Zhang, Y., Xu, X., Wang, J., He, H., Liu, W., Ding, Y., Lei, Y., Li, J., Wang, Z.,  
30     Zhang, X., Wang, Y., Cheng, J., Liu, Y., Shi, Q., Yan, L., Geng, G., Hong, C., Li, M., Liu, F., Zheng, B., Cao, J., Ding, A., Gao, J., Fu, Q.,  
31     Huo, J., Liu, B., Liu, Z., Yang, F., He, K., and Hao, J.: Drivers of improved PM2.5 air quality in China from 2013 to 2017, Proc Natl Acad  
32     Sci U S A, 116, 24463-24469, 10.1073/pnas.1907956116, 2019.
